# Supplementary material
Source: MDPI journal article supplement (https://www.mdpi.com/2673-7523/3/1/5)
Supplement: s1 [file s1]

**Supplement Table S1.** The result of the power by a post hoc test.

|                              | pN(+) | pN(-) | Post-hoc power |
|------------------------------|-------|-------|----------------|
| Patients                     | 22    | 51    | 0.871          |
| Image featrues of Lymph node | 33    | 1554  | 0.995          |
| Pathological examinations    | 20    | 37    | 0.808          |
